# Supplementary material for: Kirigami-patterned highly stretchable conductors from flexible carbon nanotube-embedded polymer films
Source: Royal Society of Chemistry journal article supplement (doi:10.1039/c7tc01727h), 2017-01-01
Supplement: c7tc01727h1.pdf [file c7tc01727h1.pdf]

## Supporting Information

### **Kirigami-Patterned Highly Stretchable Conductors from Flexible Carbon Nanotubes-Embedded Polymer Films**

*Zhihui Wang, Ling Zhang\*, Shasha Duan, Hao Jiang, Jianhua Shen, Chunzhong Li\**

Key Laboratory for Ultrafine Materials of Ministry of Education, School of Materials Science and Engineering, East China University of Science & Technology, Shanghai 200237, China.

E-mail: [zlingzi@ecust.edu.cn](mailto:zlingzi@ecust.edu.cn) (L. Zhang), [czli@ecust.edu.cn](mailto:czli@ecust.edu.cn) (C. Li). Tel: +86-21-64252055, Fax: +86-21-64250624.

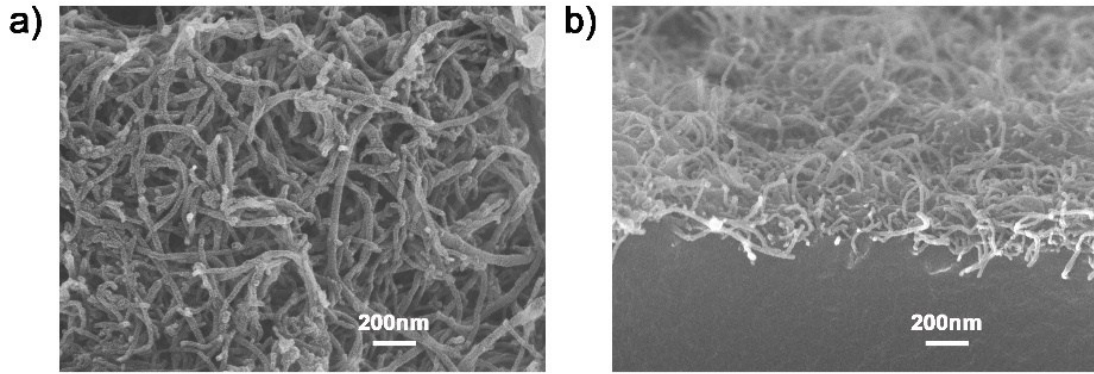

**Figure S1.** a) The surface and b) cross-section SEM images of the composite film with CNTs coated on the surface of PDMS.

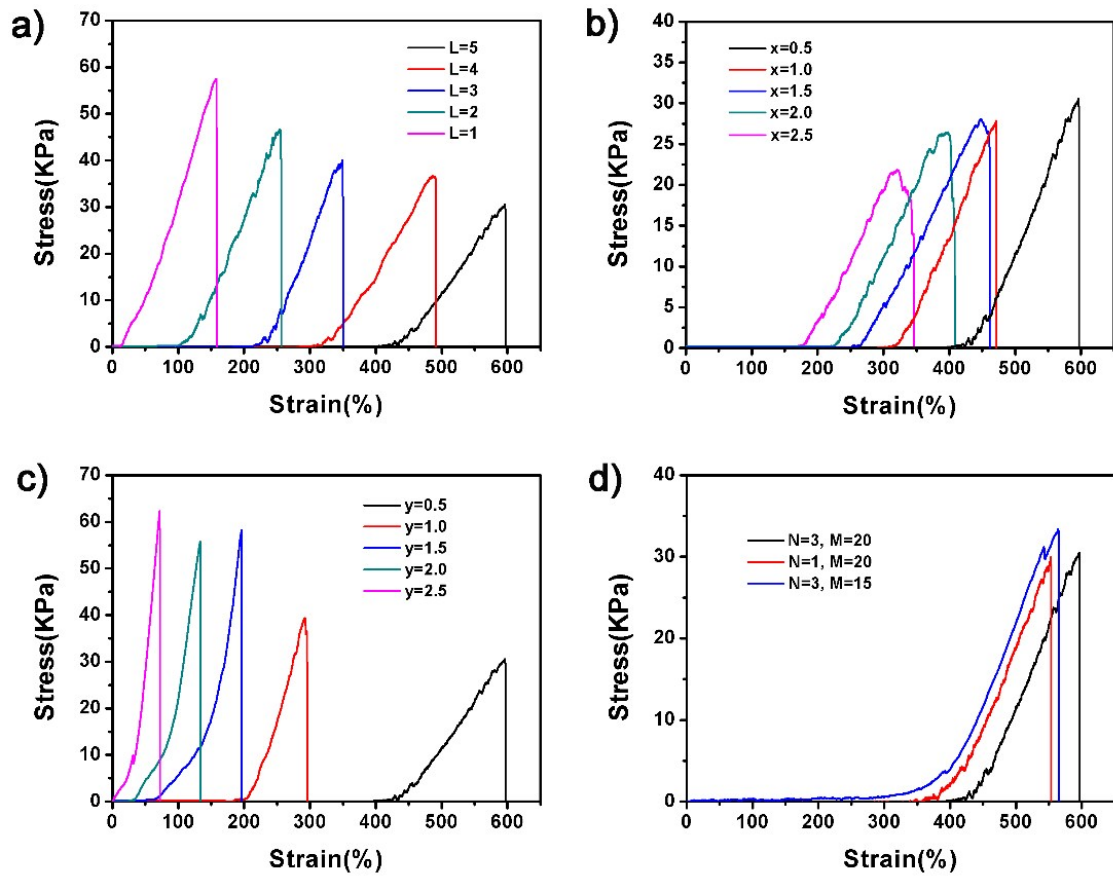

**Figure S2.** The stress-strain curves of KSCF varying characteristic parameters: a) cut length; b) transverse spacing; c) vertical spacing; d) cut numbers.

**Table S1** Dimensions and geometry of the cut patterns in details.

| <b>variable</b> | <b>classification</b> | <b>L(mm)</b> | <b>x (mm)</b> | <b>y (mm)</b> | <b>N</b> | <b>M</b> |
|-----------------|-----------------------|--------------|---------------|---------------|----------|----------|
| <b>L</b>        | KSCF <sub>L1</sub>    | 1            | 0.5           | 0.5           | 3        | 20       |
|                 | KSCF <sub>L3</sub>    | 3            | 0.5           | 0.5           | 3        | 20       |
|                 | KSCF <sub>L5</sub>    | 5            | 0.5           | 0.5           | 3        | 20       |
| <b>x</b>        | KSCF <sub>x0.5</sub>  | 5            | 0.5           | 0.5           | 3        | 20       |
|                 | KSCF <sub>x1.5</sub>  | 5            | 1.5           | 0.5           | 3        | 20       |
|                 | KSCF <sub>x2.5</sub>  | 5            | 2.5           | 0.5           | 3        | 20       |
| <b>y</b>        | KSCF <sub>y0.5</sub>  | 5            | 0.5           | 0.5           | 3        | 20       |
|                 | KSCF <sub>y1.5</sub>  | 5            | 0.5           | 1.5           | 3        | 20       |
|                 | KSCF <sub>y2.5</sub>  | 5            | 0.5           | 2.5           | 3        | 20       |
| <b>N</b>        | KSCF <sub>N1</sub>    | 5            | 0.5           | 0.5           | 1        | 20       |
|                 | KSCF <sub>N2</sub>    | 5            | 0.5           | 0.5           | 2        | 20       |
|                 | KSCF <sub>N3</sub>    | 5            | 0.5           | 0.5           | 3        | 20       |
| <b>M</b>        | KSCF <sub>M10</sub>   | 5            | 0.5           | 0.5           | 3        | 10       |
|                 | KSCF <sub>M15</sub>   | 5            | 0.5           | 0.5           | 3        | 15       |
|                 | KSCF <sub>M20</sub>   | 5            | 0.5           | 0.5           | 3        | 20       |

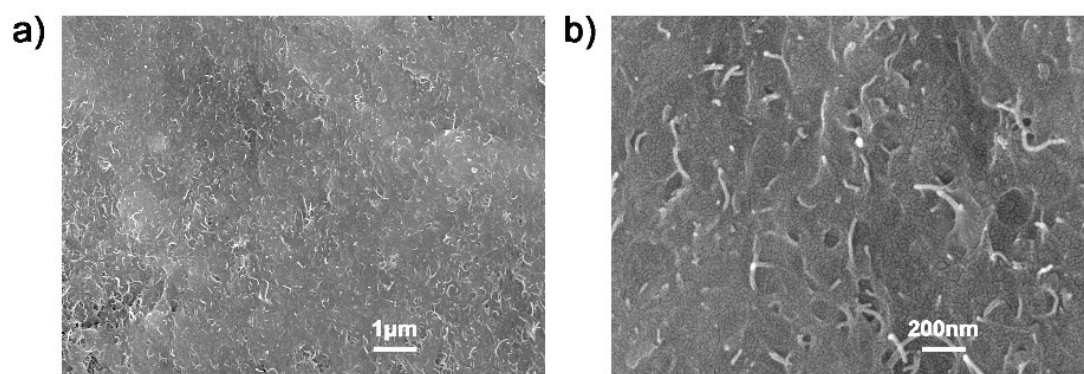

**Figure S3.** a) The surface and b) cross-section SEM images of the O-KSCF film stretched to 380% strain.

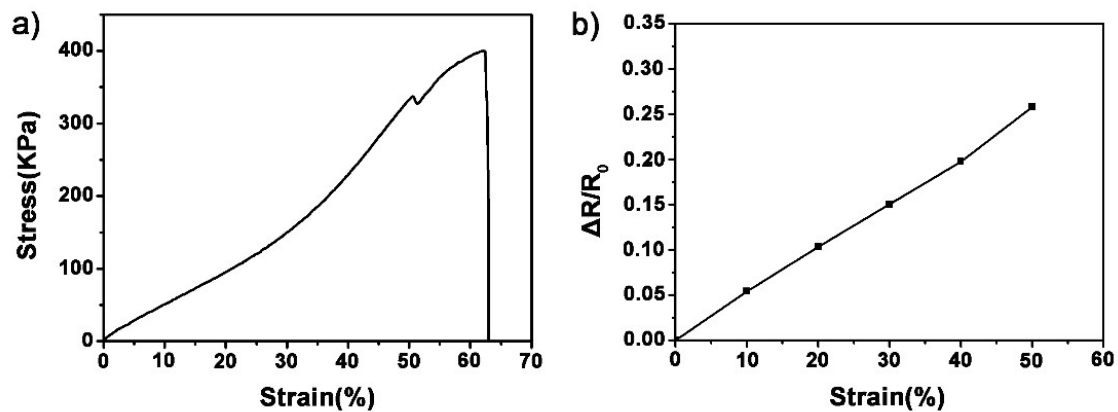

**Figure S4.** a) the stress-strain curve of a flat CNTs/PDMS film; b) the normalized resistance change as a function of tensile strain.

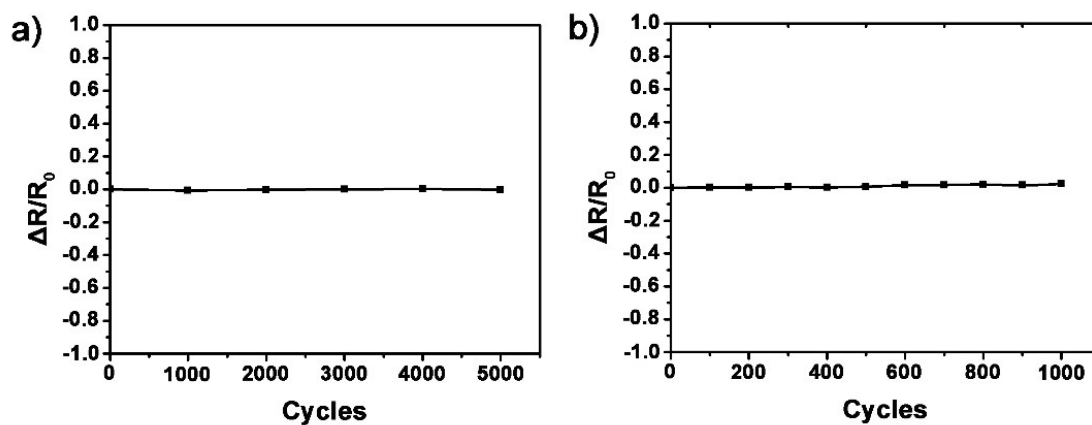

**Figure S5.** Normalized resistance of the O-KSCF as a function of a) the bending cycles at 180° and b) the twisting cycles at 360°.

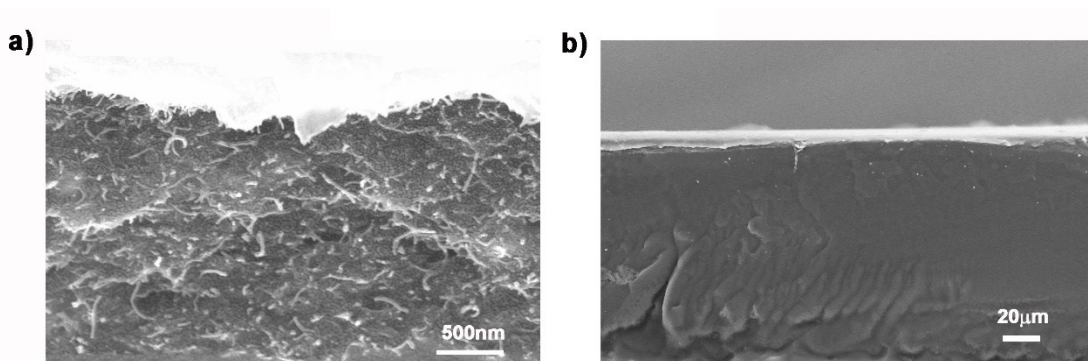

**Figure S6.** The thickness of CNT layer and PDMS film.

**Table S2** Mechanical and electrical properties of kirigami-patterned stretchable conductors compared with other patterned conductors.

| pattern                       | materials       | structured method                                  | elongation | initial conductivity    | resistance variations |
|-------------------------------|-----------------|----------------------------------------------------|------------|-------------------------|-----------------------|
| serpentine <sup>[1]</sup>     | graphene        | photolithography and reactive ion etching patterns | 106%       | 4 layers:<br>~ 480 Ω/sq | no noticeable changes |
| wavy <sup>[2]</sup>           | carbon nanotube | pre-strain                                         | 100%       | 211 Ω/sq                | 4.1%                  |
| porous aerogel <sup>[3]</sup> | copper nanowire | freeze-drying                                      | 60%        | 0.29 S/cm               | 19.5%                 |
| nanomesh <sup>[4]</sup>       | gold            | grain boundary lithography and pre-strain          | 160%       | 20~30 Ω/sq              | 150%                  |
| honeycomb <sup>[5]</sup>      | gold            | lithography                                        | 50%        | 0.055 Ω/mm <sup>2</sup> | ~600%                 |
| sponge <sup>[6]</sup>         | metal           | commercial PU                                      | 40–45%     | 1.55~8.67Ω/sq           | negligible changes    |
| kirigami (our work)           | carbon nanotube | laser cutting                                      | 430%       | 13.05 Ω/sq              | <20%                  |

## References

1. R. -H. Kim, M. -H. Bae, D. G. Kim, H. Cheng, B. H. Kim, D. -H. Kim, M. Li, J. Wu, F. Du, H.-S. Kim, S. Kim, D. Estrada, S. W. Hong, Y. G. Huang, E. Pop, and John A. Rogers, *Nano Lett.*, 2011, **11**, 3881–3886.
2. F. Xu, X. Wang, Y. T. Zhu, and Y. Zhu, *Adv. Funct. Mater.*, 2012, **22**, 1279-1283.
3. Y. Tang, S. Gong, Y. Chen, L. W. Yap, and W. L. Cheng, *ACS Nano*, 2014, **8**, 5707-5714.
4. C. F. Guo, Y. Chen, L. Tang, F. Wang, and Z. F. Ren, *Nano Lett.*, 2016, **16**, 594–600.
5. B. Kim, J. Jang, I. You, J. Park, S. Shin, G. Jeon, J. K. Kim, and U. Jeong, *ACS Appl. Mater. Interfaces*, 2015, **7**, 7920–7926.
6. Y. Yu, J. F. Zeng, C. J. Chen, Z. Xie, R. S. Guo, Z. L. Liu, X. C. Zhou, Y. Yang, and Z. J. Zheng, *Adv. Mater.*, 2014, **26**, 810–815.
